# Supplementary material
Source: Royal Society of Chemistry journal article supplement (https://www.rsc.org/suppdata/books/178262/9781782628651/bk9781782628651-erratum.pdf)
Supplement: Supplementary file 1 [file bk9781782628651-erratum.pdf]

## Correction for *Mechanisms of Primary Energy Transduction in Biology*

© The Royal Society of Chemistry 2018

There is an error in the print copy of the book in Chapter 5. This chapter should have acknowledged financial support from the National Science Foundation. The full acknowledgement statement is below.

This material is based upon work supported in part by the National Science Foundation under Grant No. 1616874 awarded to Robert Gennis.
